# Supplementary material for: Utilization Trends of Novel Hormonal Agents in Metastatic Castration-Resistant Prostate Cancer in Quebec
Source: MDPI journal article supplement (doi:10.3390/curroncol29110680), 2022-11-12
Supplement: s1 [file s1]

## Supplementary Materials

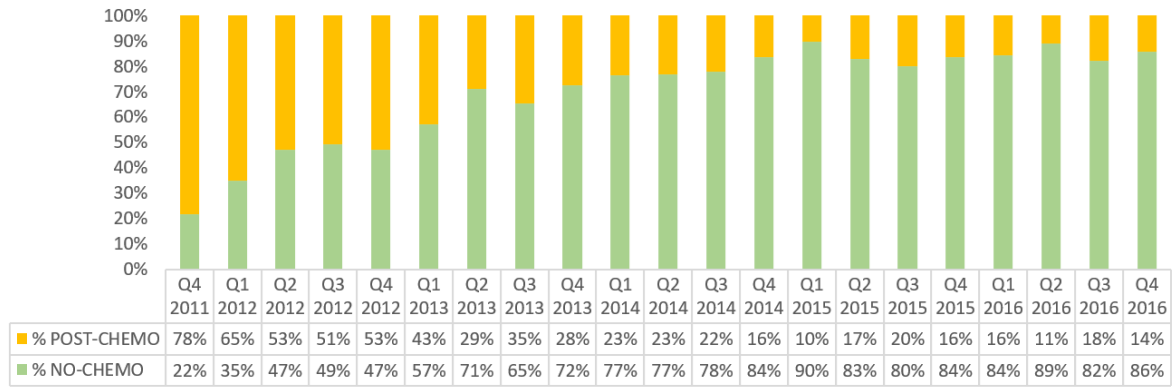

**Figure S1.** Trend of chemotherapy status in ABI users.

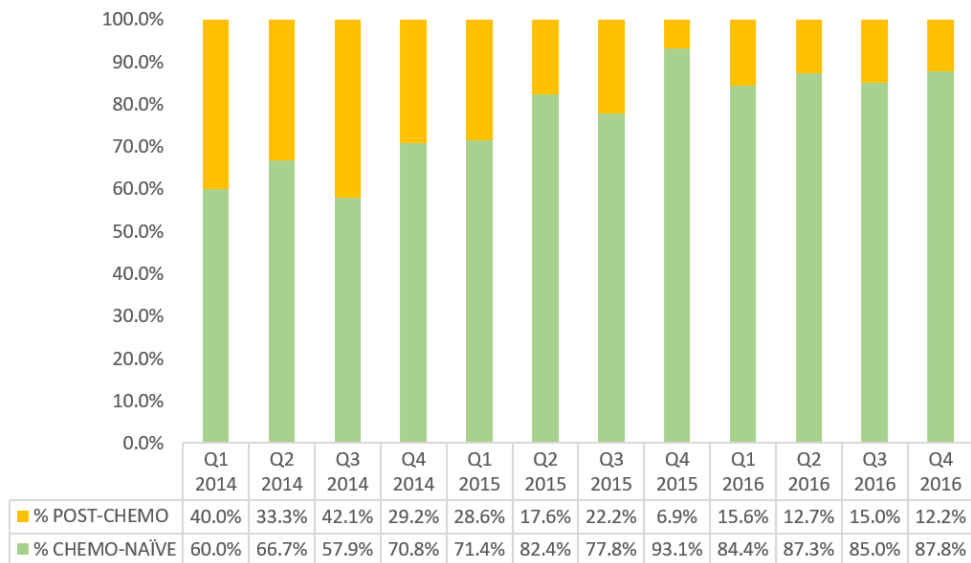

**Figure S2.** Trend of chemotherapy status in ENZ users.

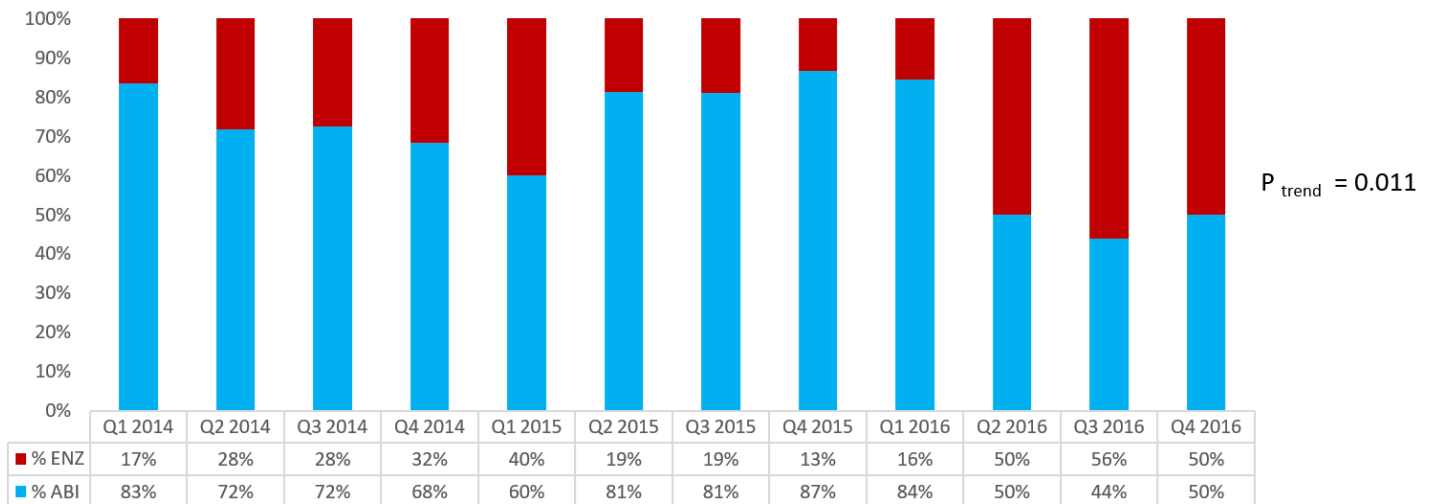

**Figure S3.** Trend of NHA type in post-chemotherapy patients in ENZ-era.

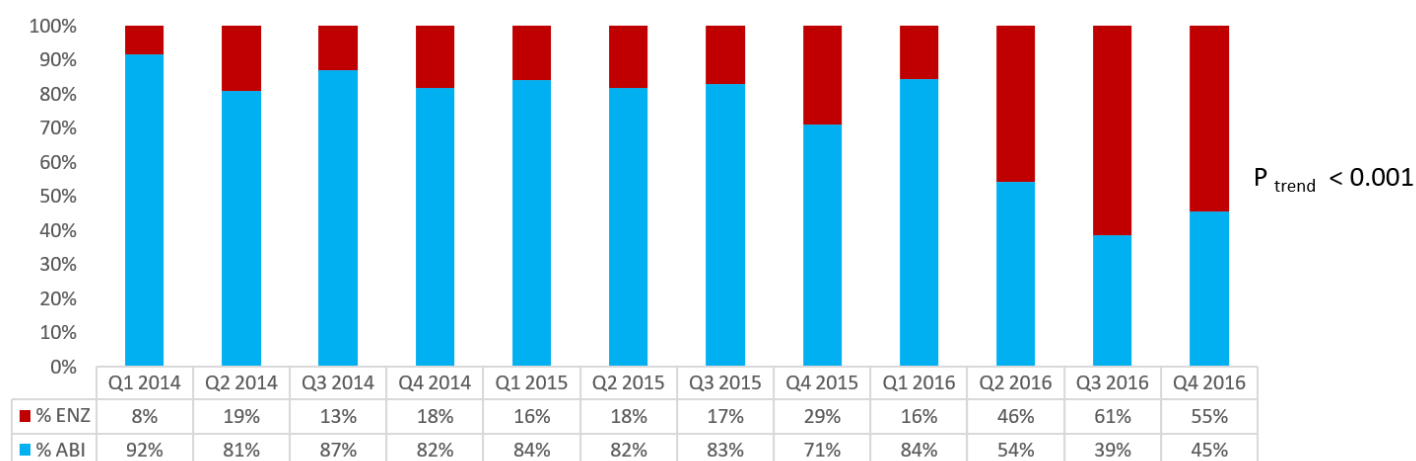

**Figure S4.** Trend of NHA type in chemotherapy-naïve patients in ENZ-era.

**Table S1.** Description of Novel Hormonal Agent Prescription Claims.

|                                                  | Year of NHA prescription claim |      |               |      |       |      |
|--------------------------------------------------|--------------------------------|------|---------------|------|-------|------|
|                                                  | 2011                           | 2012 | 2013          | 2014 | 2015  | 2016 |
| Nbr of NHA claims                                | 133                            | 1958 | 4172          | 6767 | 7796  | 8521 |
| Nbr of ABI claims                                | 133                            | 1958 | 3985          | 5756 | 6339  | 6197 |
| Nbr of ENZ claims                                | 0                              | 0    | 187           | 1011 | 1457  | 2324 |
| Prescribed daily dose (PDD) represented by claim |                                |      |               |      |       |      |
| ABI                                              |                                |      | ENZ           |      |       |      |
| ABI PDD 1000mg                                   | 95.2%                          |      | ENZ PPD 160mg |      | 94.9% |      |
| ABI PDD 750mg                                    | 1.8%                           |      | ENZ PPD 120mg |      | 1.8%  |      |
| ABI PPD 500mg                                    | 0.8%                           |      | ENZ PPD 80mg  |      | 1.6%  |      |
| ABI PPD other                                    | 2.1%                           |      | ENZ PPD other |      | 1.7%  |      |
